# Supplementary material for: Age-related epigenetic drift in the pathogenesis of MDS and AML
Source: HighWire-hosted journal article supplement (doi:10.1101/gr.157529.113), 2014-01-10
Supplement: Supp_TableS9.pdf [file Supp_TableS9.pdf]

Supplementary Table S9. Significant terms in Ingenuity pathway analysis in human MDS patients for hypermethylated genes.

| Top Networks                                                                                                        |                     |                |
|---------------------------------------------------------------------------------------------------------------------|---------------------|----------------|
| Associated Network Functions                                                                                        | Score               |                |
| Cellular Development, Nervous System Development and Function, Embryonic Development                                | 52                  |                |
| Cell Signaling, Nucleic Acid Metabolism, Small Molecule Biochemistry                                                | 44                  |                |
| Cell-To-Cell Signaling and Interaction, Nervous System Development and Function, Cellular Assembly and Organization | 41                  |                |
| Cancer, Hematological Disease, Cellular Development                                                                 | 41                  |                |
| Tissue Development, Organismal Development, Cardiovascular System Development and Function                          | 39                  |                |
| Top Bio Functions                                                                                                   |                     |                |
| Diseases and Disorders                                                                                              |                     |                |
| Name                                                                                                                | p-value             | # Molecules    |
| Organismal Injury and Abnormalities                                                                                 | 3.20E-09 - 1.38E-02 | 78             |
| Developmental Disorder                                                                                              | 1.69E-07 - 9.67E-03 | 152            |
| Ophthalmic Disease                                                                                                  | 1.69E-06 - 1.29E-03 | 58             |
| Cancer                                                                                                              | 3.74E-06 - 1.38E-02 | 329            |
| Reproductive System Disease                                                                                         | 3.74E-06 - 9.67E-03 | 199            |
| Molecular and Cellular Functions                                                                                    |                     |                |
| Name                                                                                                                | p-value             | # Molecules    |
| Cellular Development                                                                                                | 2.28E-09 - 1.30E-02 | 274            |
| Gene Expression                                                                                                     | 6.58E-09 - 8.62E-03 | 234            |
| Cell-To-Cell Signaling and Interaction                                                                              | 7.64E-08 - 1.38E-02 | 174            |
| Molecular Transport                                                                                                 | 5.68E-06 - 1.38E-02 | 136            |
| Small Molecule Biochemistry                                                                                         | 5.68E-06 - 1.38E-02 | 114            |
| Physiological System Development and Function                                                                       |                     |                |
| Name                                                                                                                | p-value             | # Molecules    |
| Embryonic Development                                                                                               | 8.11E-18 - 1.20E-02 | 219            |
| Organ Development                                                                                                   | 8.11E-18 - 1.20E-02 | 197            |
| Organismal Development                                                                                              | 8.11E-18 - 1.20E-02 | 244            |
| Tissue Development                                                                                                  | 8.11E-18 - 1.30E-02 | 290            |
| Nervous System Development and Function                                                                             | 2.28E-09 - 1.20E-02 | 224            |
| Top Canonical Pathways                                                                                              |                     |                |
| Name                                                                                                                | p-value             | Ratio          |
| Calcium Signaling                                                                                                   | 7.09E-04            | 22/207 (0.106) |
| Glutamate Receptor Signaling                                                                                        | 1.12E-03            | 11/69 (0.159)  |
| G-Protein Coupled Receptor Signaling                                                                                | 2.14E-03            | 48/530 (0.091) |
| Amyotrophic Lateral Sclerosis Signaling                                                                             | 4.62E-03            | 15/119 (0.126) |
| Role of Oct4 in Mammalian Embryonic Stem Cell Pluripotency                                                          | 5.48E-03            | 10/45 (0.222)  |
