# Supplementary material for: Age-related epigenetic drift in the pathogenesis of MDS and AML
Source: HighWire-hosted journal article supplement (doi:10.1101/gr.157529.113), 2014-01-10
Supplement: Supp_TableS12.xlsx [file Supp_TableS12.xlsx]

## Sheet: Supplementary Table S12
Supplementary Table S12. Raw data detected by DREAM in human samples.
					CB-01	CB-01	CB-02	CB-02	CB-03L1	CB-03L1	CB-03L4	CB-03L4	CB-04	CB-04	CB-05	CB-05	AB-01.1	AB-01.1	AB-01.2	AB-01.2	AB-02.1	AB-02.1	AB-02.2	AB-02.2	AB-02.3	AB-02.3	AB-03	AB-03	AB-04.1	AB-04.1	AB-04.2	AB-04.2	AB-05	AB-05	AB-06	AB-06	AB-07	AB-07	AB-08	AB-08	AB-09	AB-09	AB-10	AB-10	AB-11	AB-11	AB-12	AB-12	AB-13
SmaI_ID	Chromosome	Position	Distance to TSS	Gene name	M	U	M	U	M	U	M	U	M	U	M	U	M	U	M	U	M	U	M	U	M	U	M	U	M	U	M	U	M	U	M	U	M	U	M	U	M	U	M	U	M	U	M	U	M
s290624	chr17	28644321	-202	ASIC2	4	867	3	760	1	955	4	181	4	311	0	191	6	646	1	309	4	763	2	424	3	432	6	682	1	478	8	491	2	439	4	261	9	285	2	418	5	581	8	389	3	387	10	492	7
s290623	chr17	28644222	-103	ASIC2	6	873	5	789	4	965	6	221	3	317	1	206	6	652	3	310	3	770	10	418	4	436	7	709	1	428	8	524	5	451	6	274	7	318	4	425	2	609	8	396	3	410	8	489	7
s290621	chr17	28643197	922	ASIC2	3	619	2	223	3	585	2	174	1	405	0	180	3	922	0	299	2	319	2	434	0	341	3	279	1	326	3	188	0	178	2	125	1	69	1	150	1	205	1	179	1	158	1	129	0
s290620	chr17	28643133	986	ASIC2	1	188	0	238	4	499	2	136	1	365	1	173	0	111	1	248	1	306	0	369	0	333	4	274	1	170	4	149	0	84	1	60	0	29	2	84	3	125	0	72	1	61	0	46	0
s339909	chr20	59260306	-648	CDH4	33	490	32	486	32	465	13	93	15	178	15	107	15	180	30	292	55	845	64	509	52	447	35	588	12	267	32	513	17	203	33	122	5	92	23	106	16	211	9	177	59	131	6	102	7
s339910	chr20	59260382	-572	CDH4	0	710	5	799	2	708	1	138	1	260	2	171	1	285	4	443	3	1333	5	819	4	721	4	959	1	447	3	769	2	247	1	171	0	90	1	135	4	250	1	207	2	201	0	87	1
s339911	chr20	59260439	-515	CDH4	1	217	4	305	3	222	0	74	2	96	0	62	0	104	0	125	4	455	2	253	2	232	3	348	4	258	9	192	0	82	0	43	0	69	1	58	1	53	1	122	0	101	0	27	2
s339912	chr20	59261061	107	CDH4	0	154	2	234	0	335	0	98	0	221	0	102	0	86	0	153	5	370	4	260	0	251	2	322	2	166	5	197	0	56	0	26	0	33	1	59	0	66	2	68	0	61	0	24	1
s339913	chr20	59261122	168	CDH4	3	2559	2	1403	1	556	2	137	1	476	0	165	3	550	2	316	3	654	5	544	0	404	5	648	4	684	5	549	1	231	1	145	0	151	5	219	2	319	1	158	1	195	1	269	8
s339914	chr20	59261263	309	CDH4	12	6405	5	3511	0	1200	4	262	2	572	1	306	0	2547	0	452	2	1154	8	613	0	451	5	957	4	1079	2	906	4	802	2	454	7	580	9	653	3	998	3	530	4	672	3	964	11
s339915	chr20	59261394	440	CDH4	26	5342	17	3193	11	1039	11	330	2	359	5	206	17	3170	2	273	8	787	6	324	3	281	5	597	2	748	12	574	8	795	12	440	13	545	18	633	21	985	8	554	6	683	9	897	18
s339916	chr20	59261664	710	CDH4	2	1567	4	1184	1	538	1	231	1	191	0	109	3	1458	0	119	2	280	1	196	0	132	1	262	0	199	2	245	3	399	1	233	4	190	9	327	4	503	6	288	4	304	2	320	3
s339917	chr20	59261737	783	CDH4	12	3337	16	3063	3	753	5	366	1	403	1	233	4	1455	5	365	0	408	7	684	1	307	4	344	5	380	8	327	7	560	8	391	9	405	6	564	17	772	2	447	5	544	5	619	11
s339918	chr20	59261937	983	CDH4	3	3227	6	2928	3	541	2	316	0	304	1	194	3	1404	0	265	0	152	2	522	1	180	0	126	0	344	3	175	0	490	0	350	4	401	1	540	3	686	3	399	3	486	4	620	1
s280157	chr16	81218750	671	CDH13	20	3377	6	1954	2	585	3	139	1	196	2	97	3	1120	2	199	2	529	2	288	3	233	2	438	1	256	2	443	0	377	7	213	1	207	3	284	3	385	2	265	3	302	6	415	9
s280158	chr16	81218886	807	CDH13	14	3885	13	2376	6	1111	1	258	2	389	2	214	2	1310	2	548	1	965	6	743	6	609	6	869	3	512	6	759	3	682	3	409	12	395	7	506	9	751	12	487	7	567	9	687	10
s280159	chr16	81218982	903	CDH13	0	893	2	985	1	1213	3	239	2	447	1	251	2	377	2	687	11	1230	14	984	7	837	8	972	7	554	5	758	0	494	8	297	4	239	6	332	5	601	3	364	11	364	11	341	7
s280160	chr16	81219052	973	CDH13	2	421	0	574	4	696	0	130	1	265	1	138	0	206	3	338	4	827	6	535	1	468	3	551	3	360	5	471	5	191	4	117	1	87	3	128	3	258	8	149	0	124	3	103	3
s302894	chr18	491073	-344	COLEC12	9	3443	4	1572	4	770	2	173	0	245	2	140	8	1396	3	444	5	441	5	690	5	665	3	339	9	505	2	314	18	485	8	259	1	292	5	328	4	563	7	273	3	323	13	449	8
s302893	chr18	490954	-225	COLEC12	26	3367	4	1530	4	746	0	204	1	249	3	138	15	1378	3	438	2	66	7	681	3	652	2	99	0	4	5	98	8	530	4	285	7	330	2	381	4	621	3	371	4	393	8	503	11
s302892	chr18	490398	331	COLEC12	0	99	0	162	0	364	0	143	1	259	1	118	0	78	0	122	0	232	3	239	0	169	0	187	0	155	2	68	1	87	1	69	0	74	0	90	2	146	0	140	0	126	0	67	1
s302891	chr18	490335	394	COLEC12	0	97	0	168	0	358	1	108	0	248	0	110	0	86	0	114	2	231	2	238	0	168	1	177	1	158	0	65	0	67	0	43	0	30	0	56	0	115	1	46	0	65	0	48	0
s315449	chr19	6415725	465	CRB3	3	33	0	28	1	49	14	59	3	55	3	29	4	22	0	1	0	3	0	2	3	12	0	0	0	3	0	4	40	240	30	162	32	131	35	260	52	272	51	203	28	226	49	198	34
s112296	chr6	11152127	483	ELOVL2	3	4293	13	5348	0	533	5	282	1	181	0	118	8	2657	0	104	1	190	2	237	0	38	0	82	2	347	0	148	9	713	9	337	4	395	2	617	4	826	6	475	2	638	2	671	4
s112295	chr6	11151901	709	ELOVL2	14	4283	13	5373	4	505	2	227	3	169	0	126	8	2603	0	107	1	185	5	237	2	40	0	88	1	325	2	151	5	611	5	283	10	340	6	491	4	681	2	401	7	528	7	559	12
s148095	chr7	154942710	-875	EN2	3	594	7	1551	0	82	2	111	0	28	0	28	2	710	0	3	0	2	0	1	0	5	0	1	0	5	0	7	6	227	3	138	3	168	4	190	1	272	5	276	3	290	1	198	5
s148096	chr7	154943382	-203	EN2	1	136	1	192	0	302	1	61	0	201	0	66	1	88	3	107	1	331	1	209	2	192	4	232	0	336	2	155	0	40	0	28	2	50	1	32	2	40	1	88	1	69	1	12	0
s148097	chr7	154943437	-148	EN2	2	248	5	343	5	677	0	137	2	153	0	171	1	154	2	227	6	583	8	376	3	321	3	385	2	502	6	216	1	93	1	59	1	34	2	67	2	116	1	75	1	58	1	25	3
s148098	chr7	154943500	-85	EN2	1	143	1	179	2	395	1	169	1	261	0	126	0	80	0	119	1	276	4	169	1	131	2	204	0	208	0	90	3	302	3	217	1	168	4	273	3	373	3	174	4	315	2	265	4
s125534	chr6	152170499	-8	ESR1	2	323	2	337	1	693	0	218	3	505	1	223	1	195	2	521	1	392	2	772	1	637	2	267	0	174	1	108	2	282	1	209	2	170	4	337	1	528	2	222	0	238	4	254	2
s125535	chr6	152170588	81	ESR1	1	318	2	348	7	738	10	268	2	509	2	214	2	192	4	516	2	387	7	766	13	634	3	269	4	184	7	101	20	548	7	349	11	256	10	523	10	833	2	422	15	484	22	454	7
s125536	chr6	152170987	480	ESR1	0	94	0	315	0	104	1	114	0	43	0	18	0	141	0	1	0	2	0	0	0	2	0	0	0	11	0	4	1	395	1	204	1	175	3	315	2	473	4	275	1	354	5	309	2
s125538	chr6	152171348	841	ESR1	10	3577	1	1729	2	1554	1	735	1	930	0	663	3	1924	3	905	4	1144	9	1190	3	1089	5	1037	2	382	10	1004	3	1029	8	807	8	971	7	1308	15	1777	10	807	3	953	5	1495	6
s125539	chr6	152171464	957	ESR1	11	3585	7	1757	7	1571	6	759	1	939	0	664	1	1932	4	927	5	1138	13	1186	15	1087	11	1005	2	411	10	982	3	1093	11	851	5	993	13	1338	16	1823	6	885	5	1060	12	1572	15
s257948	chr15	46724888	389	FBN1	1	3239	4	3045	0	657	0	341	0	273	0	191	0	1384	0	309	2	296	2	546	0	317	0	189	0	158	2	289	1	453	0	329	1	362	0	515	2	630	1	430	0	549	0	525	1
s257947	chr15	46724705	572	FBN1	3	3408	2	3294	0	962	0	410	0	452	1	269	2	1470	1	490	5	767	4	849	1	576	2	543	3	399	6	512	2	502	2	355	1	365	2	533	4	686	6	458	2	560	0	543	1
s257946	chr15	46724647	630	FBN1	1	2692	7	3910	1	596	1	229	0	266	0	152	3	2210	0	201	1	503	3	345	0	245	1	357	0	316	2	298	3	492	0	254	1	236	2	328	3	465	2	352	2	460	0	382	4
s257945	chr15	46724381	896	FBN1	4	2591	6	3744	0	610	2	241	0	256	0	162	5	2182	0	123	2	254	2	172	0	155	1	146	4	249	7	166	3	517	5	291	3	269	2	363	6	547	0	408	1	499	2	414	2
s257944	chr15	46724302	975	FBN1	0	92	0	128	1	298	0	74	0	173	0	80	1	81	0	88	3	205	2	97	2	135	1	92	0	91	1	67	0	74	1	59	1	50	0	82	1	122	0	96	0	66	0	61	0
s340444	chr20	60484895	-474	GATA5	52	5622	47	5450	14	909	13	303	4	292	2	194	45	2466	8	215	3	399	4	350	1	165	0	233	2	574	3	351	12	731	14	422	12	444	15	593	9	881	8	438	7	680	16	796	14
s340443	chr20	60484701	-280	GATA5	28	5698	23	5522	12	916	9	313	4	298	4	192	13	2507	1	222	4	398	3	357	1	164	2	224	4	592	6	340	8	754	9	423	11	436	15	583	14	881	5	451	4	700	9	777	9
s340442	chr20	60484455	-34	GATA5	3	398	2	365	9	887	3	234	0	528	1	294	2	268	0	127	3	452	2	176	2	167	1	286	4	327	4	200	7	415	3	268	11	284	5	460	8	639	9	299	2	306	2	371	6
s340441	chr20	60484365	56	GATA5	4	1894	4	1063	12	1502	5	362	1	732	2	408	7	917	2	272	6	853	1	380	0	320	4	765	13	757	17	642	4	754	7	448	12	509	9	736	7	1013	4	480	4	530	7	763	10
s340440	chr20	60484241	180	GATA5	8	1776	0	1041	11	1083	1	236	3	508	2	252	4	782	0	377	5	849	3	623	2	513	9	884	2	594	18	652	5	377	4	208	5	235	3	305	5	400	5	208	1	253	4	423	2
s340439	chr20	60484186	235	GATA5	6	539	2	647	14	1209	6	374	4	850	5	472	0	347	16	756	7	962	17	1154	9	1047	13	872	1	490	12	588	1	248	3	198	8	139	7	319	6	465	1	214	3	208	4	147	23
s340438	chr20	60484110	311	GATA5	6	326	2	373	10	800	5	382	1	547	2	340	4	281	7	493	5	487	9	693	6	652	6	463	11	258	10	365	0	689	11	443	5	346	5	721	12	912	7	498	4	611	5	520	6
s340437	chr20	60483743	678	GATA5	0	49	0	57	1	235	4	149	3	107	0	68	1	98	3	11	4	114	0	17	0	19	4	114	2	43	1	45	10	496	9	289	14	215	5	420	10	503	3	340	8	428	9	393	11
s340436	chr20	60483709	712	GATA5	5	39	1	43	4	232	5	174	2	127	1	76	4	33	0	15	5	130	1	16	1	18	9	129	3	61	3	56	38	299	17	244	18	196	14	354	22	436	15	303	12	394	8	321	21
s340435	chr20	60483316	1105	GATA5	2	33	1	43	1	68	5	154	2	19	1	15	2	23	0	2	0	1	0	0	0	0	0	0	0	4	0	0	25	351	26	244	17	198	25	347	34	467	14	340	42	379	12	340	15
s340434	chr20	60482722	1699	GATA5	0	46	0	69	0	25	1	25	0	25	0	15	0	44	0	3	0	0	0	1	0	9	0	0	0	5	0	1	0	35	1	20	0	17	0	32	0	35	0	44	0	28	0	50	0
s143826	chr7	124192378	539	GPR37	3	3533	1	1855	0	661	1	150	0	158	0	108	2	1641	1	230	2	765	0	336	0	354	5	631	1	637	5	583	0	436	1	198	4	250	1	295	0	506	1	262	1	366	0	458	5
s143825	chr7	124192256	661	GPR37	20	6652	20	5601	3	922	0	275	2	248	1	179	28	4481	5	221	3	758	2	337	6	331	4	616	4	650	14	570	15	952	3	462	11	454	4	629	10	1036	4	641	8	837	11	915	14
s143824	chr7	124191992	925	GPR37	16	3223	14	3921	5	594	2	184	4	231	1	146	21	2876	2	93	0	331	2	173	1	149	1	287	0	271	3	168	12	528	8	270	5	226	4	364	4	575	4	420	5	494	3	488	5
s143823	chr7	124191938	979	GPR37	6	899	6	1893	0	434	3	300	2	228	1	123	2	767	2	75	1	294	0	145	1	151	3	256	3	240	0	114	2	370	2	290	2	213	12	410	8	559	8	380	4	428	15	355	5
s91183	chr4	174687443	510	HAND2	7	843	4	681	7	1041	6	248	2	541	5	268	10	376	16	628	12	790	16	884	15	748	13	605	1	289	20	516	9	551	21	445	18	410	21	547	17	786	16	465	12	458	21	598	14
s91182	chr4	174687349	604	HAND2	13	2785	2	673	3	1604	2	487	2	738	1	413	8	1435	6	729	6	913	12	1021	4	851	6	770	7	759	8	647	17	937	11	675	13	720	12	974	14	1297	9	714	8	815	14	1083	14
s91181	chr4	174687179	774	HAND2	6	1988	0	84	2	743	3	253	3	292	1	189	2	1065	1	113	0	313	5	169	1	140	2	249	2	417	0	151	0	444	3	257	6	313	3	447	4	556	4	302	4	392	1	525	7
s91178	chr4	174687078	875	HAND2	1	134	0	356	0	187	1	130	0	45	0	27	6	249	0	2	0	0	0	1	0	2	0	3	0	5	0	5	2	318	2	164	3	132	1	251	3	358	2	269	8	297	2	348	2
s91177	chr4	174686747	1206	HAND2	0	151	0	382	0	189	2	129	0	46	0	25	1	274	0	3	0	1	0	0	0	1	0	2	0	2	0	5	1	337	3	168	4	154	1	270	4	364	4	282	3	306	2	357	2
s222514	chr12	52635008	27	HOXC12	2	633	4	643	1	1276	6	566	6	921	0	577	1	340	5	772	3	835	13	1115	7	1004	2	723	2	283	6	582	3	550	12	526	8	456	14	744	8	1204	6	540	2	523	6	483	5
s222515	chr12	52635092	111	HOXC12	102	5535	113	7431	34	1872	26	842	22	1090	21	695	142	4490	28	819	31	962	47	1208	27	1008	22	783	30	620	38	788	42	1130	44	838	48	832	56	1326	93	1852	59	902	32	998	42	1122	46
s222516	chr12	52635328	347	HOXC12	31	4977	34	6871	3	619	1	276	1	190	1	132	70	4221	2	75	2	156	1	122	0	21	2	86	10	435	10	251	23	601	25	324	15	398	27	611	18	774	13	390	23	474	19	659	19
s272092	chr16	22732150	-1211	HS3ST2	1	737	3	691	5	751	1	212	0	315	0	172	3	390	7	400	1	625	5	550	2	577	2	555	2	324	8	417	5	385	6	255	4	236	1	346	4	510	8	277	5	285	2	303	6
s272093	chr16	22732242	-1119	HS3ST2	5	743	6	696	8	755	3	206	5	308	2	170	3	393	3	399	0	629	2	552	2	582	1	554	3	358	4	425	7	387	9	241	4	227	2	332	6	503	4	255	3	272	3	283	7
s190719	chr10	79067951	-368	KCNMA1	6	5152	2	3809	2	834	1	241	0	296	0	178	1	1698	2	184	0	424	0	318	1	244	2	390	1	546	2	473	3	603	1	375	4	387	1	438	2	705	7	409	0	535	5	629	1
s190718	chr10	79067793	-210	KCNMA1	4	5084	6	3806	3	890	1	253	0	335	0	192	8	1636	1	185	1	460	1	324	1	247	2	413	2	523	5	472	5	612	4	363	4	368	2	422	3	691	1	412	1	534	4	617	3
s190715	chr10	79067689	-106	KCNMA1	0	78	0	117	0	528	1	84	0	183	1	92	1	53	1	99	3	285	4	174	1	100	5	145	3	249	2	65	3	59	1	36	2	12	1	30	2	55	0	46	0	33	1	20	0
s190714	chr10	79067626	-43	KCNMA1	0	82	2	100	1	328	0	85	1	111	0	66	0	47	0	58	0	190	1	118	2	70	0	154	0	81	0	30	0	102	0	55	2	42	0	59	0	88	1	73	0	70	0	61	0
s144639	chr7	130068931	497	KLF14	384	2734	189	1393	162	975	109	342	96	409	67	269	216	848	90	212	90	502	125	398	88	333	87	447	52	228	125	377	158	682	181	331	172	394	205	585	268	775	130	394	146	523	305	738	258
s144638	chr7	130068802	626	KLF14	187	2922	115	1461	63	1069	35	377	29	471	18	318	125	931	38	266	58	526	56	469	26	394	33	499	33	260	67	416	135	573	78	360	80	465	62	648	97	853	53	362	58	526	140	804	103
s70841	chr3	135852737	-183	KY	0	36	0	64	0	61	2	202	0	20	0	15	0	34	0	7	0	0	0	3	0	4	0	1	0	2	0	2	0	406	1	247	1	200	2	360	0	574	1	427	2	407	1	352	1
s140883	chr7	98083877	-656	NPTX2	1	143	3	203	8	433	10	232	7	386	8	220	2	99	4	213	6	404	10	408	8	437	10	418	4	108	7	235	5	99	6	97	3	52	5	136	5	191	1	102	6	65	3	57	1
s140884	chr7	98083943	-590	NPTX2	5	149	7	195	13	459	17	391	18	367	8	221	4	99	16	196	10	384	16	395	16	425	10	369	4	86	21	176	75	374	33	338	21	233	36	468	34	673	34	397	18	482	37	344	45
s140886	chr7	98085466	933	NPTX2	18	1833	3	959	6	889	4	230	3	381	1	224	8	1154	5	527	4	747	7	735	7	661	6	581	2	318	7	555	10	472	6	308	9	366	8	423	12	679	11	349	1	387	16	540	10
s140887	chr7	98085579	1046	NPTX2	10	1848	5	966	4	864	5	223	3	374	3	228	16	1149	11	512	11	732	7	733	7	661	6	578	8	323	12	550	4	474	6	294	8	342	5	401	3	662	9	335	4	353	6	512	3
s54470	chr2	222871766	178	PAX3	9	5860	18	7413	1	543	4	383	2	193	1	123	24	4119	0	94	1	161	2	153	0	24	1	73	2	267	4	206	4	900	12	532	8	504	8	795	12	1139	10	751	5	863	4	880	11
s54469	chr2	222871532	412	PAX3	31	4056	25	4777	6	271	2	109	2	62	2	44	44	2505	2	75	1	154	4	119	0	27	2	65	6	329	7	183	6	530	19	233	19	222	13	312	13	460	12	327	7	408	12	447	18
s212112	chr11	100504984	770	PGR	5	410	5	428	12	873	13	289	13	545	6	316	2	229	9	343	3	427	10	512	4	434	9	392	3	343	15	295	8	312	20	264	13	225	6	402	11	588	6	263	4	266	13	232	8
s212111	chr11	100504902	852	PGR	58	5181	75	6921	16	1228	12	532	9	700	11	407	88	4322	3	478	9	536	14	690	13	509	10	466	8	537	17	443	16	883	24	619	15	483	20	833	23	1247	13	661	22	747	17	728	24
s212110	chr11	100504640	1114	PGR	250	11203	175	12870	22	1033	23	431	11	315	4	215	147	6389	10	272	13	469	23	479	4	246	6	252	20	666	6	454	28	1046	36	591	20	590	52	792	28	1300	35	783	20	951	27	1042	285
s212109	chr11	100504453	1301	PGR	87	7707	34	8455	8	907	11	301	3	230	3	151	28	3196	4	209	7	428	6	387	2	232	3	226	11	536	11	345	20	877	9	480	9	468	18	623	20	1029	13	657	11	835	12	906	17
s87674	chr4	122063536	-73	PRDM5	3	1957	1	998	1	691	4	135	1	162	0	106	3	977	0	111	1	460	1	157	0	146	5	588	0	397	1	504	2	429	0	207	0	262	2	289	1	454	2	275	1	314	2	463	6
s87673	chr4	122063405	58	PRDM5	8	7255	8	6395	1	1127	4	323	0	283	0	205	2	2604	0	264	4	806	2	395	1	286	5	778	1	915	0	842	1	853	2	420	0	517	6	620	4	1003	2	619	4	730	3	878	6
s87672	chr4	122063220	243	PRDM5	3	5504	5	5734	1	1106	1	481	0	838	0	466	2	1720	0	422	2	1057	2	801	2	673	2	647	2	413	0	579	0	457	1	273	0	272	2	396	1	624	0	402	4	452	2	455	3
s87671	chr4	122063168	295	PRDM5	2	3782	3	2133	1	1534	8	463	0	1083	0	517	2	1865	0	464	6	1639	4	909	2	839	2	1110	6	1285	7	914	0	731	1	408	2	379	8	609	1	832	3	454	4	533	1	755	4
s87670	chr4	122063041	422	PRDM5	2	3460	4	1685	2	960	3	177	0	401	1	180	3	1747	0	152	1	933	4	271	0	271	1	672	5	998	4	582	2	657	0	337	2	353	2	226	3	699	1	384	2	479	4	686	7
s32725	chr2	5749127	-1123	SOX11	9	1422	18	2477	1	121	0	104	0	28	0	31	13	1163	0	7	1	4	0	9	0	1	0	5	0	29	0	18	9	222	7	109	5	105	9	173	9	239	7	170	8	193	9	177	9
s32726	chr2	5749415	-835	SOX11	8	1555	18	2661	2	502	5	161	1	242	0	109	20	1178	4	199	5	288	5	338	1	275	2	262	4	193	6	150	9	264	10	127	7	111	11	190	9	263	3	199	5	213	14	183	8
s32727	chr2	5749470	-780	SOX11	2	432	0	525	1	915	1	150	2	469	2	181	2	248	11	402	7	766	7	567	4	514	6	679	7	578	11	404	11	224	8	143	4	119	6	200	3	293	6	157	1	160	6	129	6
s32728	chr2	5749551	-699	SOX11	8	367	7	435	13	827	4	169	10	517	10	204	11	239	17	249	8	756	15	345	12	349	18	646	22	541	37	344	24	176	14	119	13	105	20	177	18	240	7	138	7	150	10	120	14
s32729	chr2	5749594	-656	SOX11	0	177	0	242	4	546	4	119	0	481	3	219	1	124	2	92	3	541	3	146	4	149	3	467	3	319	5	229	2	24	0	17	1	14	0	40	4	43	1	24	0	19	0	21	2
s32730	chr2	5749629	-621	SOX11	0	167	3	279	2	483	3	110	1	386	2	187	0	125	1	95	3	474	3	157	3	148	8	443	4	225	7	221	1	27	0	15	0	12	3	24	0	53	2	25	0	21	2	11	3
s32731	chr2	5749680	-570	SOX11	5	164	2	314	9	518	2	146	5	368	6	152	6	110	7	116	12	433	12	207	8	199	23	427	33	348	22	197	2	21	3	18	1	13	4	21	4	41	1	28	3	18	0	9	1
s32732	chr2	5749726	-524	SOX11	9	475	4	1022	1	335	5	142	3	233	2	99	12	404	3	58	7	236	1	108	1	107	6	220	14	210	8	114	10	148	5	133	8	92	9	236	9	257	6	169	6	206	6	164	10
s32733	chr2	5750046	-204	SOX11	1	574	1	1157	0	47	0	74	0	30	0	19	2	369	0	2	0	4	0	4	0	1	0	4	1	46	1	5	3	158	2	130	4	94	2	227	2	238	4	157	3	196	7	166	6
s32734	chr2	5750275	25	SOX11	5	830	10	992	2	770	1	123	1	331	1	164	3	296	9	392	12	962	7	625	3	647	11	692	17	511	16	544	14	281	16	174	4	118	9	210	15	322	8	199	13	174	8	137	3
s32735	chr2	5750351	101	SOX11	6	663	4	716	10	758	3	120	9	326	3	161	1	294	10	388	13	953	13	612	11	646	10	708	10	481	19	549	10	268	9	175	11	123	10	209	16	307	6	203	4	179	5	144	9
s108043	chr5	170668202	-691	TLX3	3	766	6	631	8	430	1	69	4	123	2	78	6	614	4	146	5	636	7	173	4	175	6	490	4	532	9	451	2	279	2	153	9	151	5	191	7	316	3	177	2	201	4	226	8
s108044	chr5	170668305	-588	TLX3	11	1018	12	924	16	1000	6	219	10	445	12	254	29	736	28	364	29	1122	40	524	21	594	32	944	30	738	71	738	23	413	42	240	29	204	35	342	47	547	23	296	13	318	36	287	27
s108045	chr5	170668380	-513	TLX3	3	279	1	335	8	586	1	164	3	330	3	185	5	168	3	247	7	472	10	367	11	433	11	419	6	294	8	276	8	169	9	137	7	110	8	194	14	291	5	156	1	152	3	125	4
s108046	chr5	170669119	226	TLX3	23	4990	27	3681	3	458	0	103	0	104	1	71	20	1640	4	115	3	541	4	203	3	152	6	404	7	425	8	434	8	341	12	162	9	193	6	214	7	337	5	202	6	275	7	334	12
s108047	chr5	170669266	373	TLX3	72	7885	53	7498	15	888	4	303	2	258	6	198	72	4203	4	164	11	566	12	303	2	165	7	427	6	522	18	476	27	876	26	489	26	472	21	794	22	1012	26	562	21	727	17	909	34
s108048	chr5	170669527	634	TLX3	3	3225	11	4198	2	807	2	303	1	372	0	230	5	2723	0	227	3	744	3	506	3	348	1	571	2	282	10	349	4	627	11	364	3	330	7	636	3	773	4	445	2	537	2	619	8
s108049	chr5	170669583	690	TLX3	12	2736	40	3732	10	806	12	437	4	372	2	233	31	2167	3	200	16	711	11	430	10	343	10	543	9	260	11	308	23	656	8	516	18	411	7	691	22	909	11	601	14	729	20	630	13
s108050	chr5	170669861	968	TLX3	11	2485	6	3413	0	442	2	349	1	163	0	144	2	2077	0	15	2	16	0	23	0	1	0	7	0	54	0	47	4	638	11	498	7	403	1	673	2	895	8	561	3	729	5	656	11
s108051	chr5	170670601	1708	TLX3	42	6527	40	4617	3	673	5	280	10	534	2	303	14	1989	4	280	6	580	5	469	1	434	5	384	8	651	9	440	7	553	6	415	15	446	5	587	4	894	3	443	3	508	4	645	7
s108052	chr5	170670751	1858	TLX3	28	13284	19	10663	5	1580	5	585	0	780	3	466	11	4331	1	562	1	1165	8	946	2	713	6	725	3	1175	11	878	8	1289	5	846	15	953	6	1181	6	1833	0	973	1	1151	9	1442	16
s51517	chr2	192768240	-351	TMEFF2	13	5681	17	6661	3	778	6	329	0	263	1	176	23	4339	0	105	0	152	2	203	0	28	1	66	1	286	1	193	9	942	6	582	7	514	4	744	6	1024	2	688	5	809	4	873	6
s51516	chr2	192767996	-107	TMEFF2	4	6017	8	7169	0	1325	6	441	0	542	1	289	1	4502	0	406	3	1036	3	764	5	501	0	664	1	669	4	497	0	1020	0	622	1	529	0	788	0	1106	1	720	0	847	1	895	2
s51515	chr2	192767939	-50	TMEFF2	0	403	1	585	0	613	1	155	0	309	0	142	0	185	0	309	1	857	4	559	1	484	3	588	1	380	2	297	0	137	0	93	0	40	0	108	0	143	0	102	0	128	1	92	0
s143800	chr7	123460542	217	TMEM229A	3	3244	6	1735	1	511	2	149	1	177	0	80	3	1208	0	110	5	345	2	202	1	156	2	384	0	503	5	367	9	374	0	186	4	207	0	259	2	372	1	233	7	294	4	396	12
s143799	chr7	123460408	351	TMEM229A	16	3224	4	1721	2	499	2	155	5	174	0	80	3	1203	2	107	2	348	2	201	2	158	4	407	7	534	5	383	12	412	5	198	11	200	1	265	6	400	5	269	3	335	4	398	9
s203239	chr11	32413510	153	WT1	4	4463	4	3242	0	266	0	88	0	66	0	49	3	1219	0	136	2	570	3	196	2	183	0	421	3	640	6	444	3	238	3	94	0	121	2	134	1	210	2	115	0	167	6	200	5
s203238	chr11	32413361	302	WT1	10	9288	8	8893	1	466	2	140	0	107	0	80	4	3908	0	239	2	724	3	344	0	214	0	511	1	1005	5	664	0	239	4	173	1	232	3	245	0	216	2	127	0	508	1	218	6
s203237	chr11	32413136	527	WT1	22	4829	16	5641	0	196	2	39	0	34	1	27	25	2666	0	97	0	146	1	149	1	31	1	90	5	414	5	209	0	0	3	78	2	108	2	115	0	1	0	1	4	330	0	3	1
s56836	chr2	238673790	100	ESPNL	158	343	110	303	150	268	75	68	82	148	97	49	16	348	23	259	79	563	97	290	55	234	73	419	122	403	40	317	40	350	29	194	28	191	72	182	138	281	55	167	58	236	72	249	52
s56837	chr2	238673886	196	ESPNL	386	141	326	143	573	128	305	31	465	155	332	38	93	294	98	265	316	479	391	241	277	226	317	354	301	253	260	183	292	100	151	87	135	77	135	95	342	88	191	45	220	81	196	128	199
s56838	chr2	238673933	243	ESPNL	1314	121	1075	175	443	32	403	18	493	32	307	5	581	1315	76	49	263	39	302	11	206	9	239	31	405	47	155	42	322	43	238	34	204	38	315	44	416	40	221	15	287	42	324	63	350
[truncated: 233 more columns]
