# Supplementary material for: Age-related epigenetic drift in the pathogenesis of MDS and AML
Source: HighWire-hosted journal article supplement (doi:10.1101/gr.157529.113), 2014-01-10
Supplement: Supp_TableS13.xlsx [file Supp_TableS13.xlsx]

## Sheet: Supplementary Table S13
Supplementary Table S13. Normalized methylation values detected by DREAM in human samples.
			Cord Blood						Adult Blood														MDS																					AML
			CB-01	CB-02	CB-03	CB-04	CB-05		AB-01	AB-02	AB-03	AB-04	AB-05	AB-06	AB-07	AB-08	AB-09	AB-10	AB-11	AB-12	AB-13		MDS-08	MDS-12	MDS-21	MDS-25	MDS-26	MDS-27	MDS-28	MDS-29	MDS-30	MDS-32	MDS-35	MDS-37	MDS-38	MDS-39	MDS-40	MDS-41	MDS-42	MDS-43	MDS-44	MDS-45		AML-01	AML-02	AML-03	AML-04	AML-05	AML-06
Gene name	Distance to TSS	Age (y. o.)	0	0	0	0	0		ND	18	18	55	84	76	73	57	85	82	73	86	70		62	61	65	65	68	76	60	23	77	72	62	48	85	53	64	66	58	68	68	76		72	75	42	62	64	76
ASIC2	-202		0.621435	0.586718	0.641648	1.02153	0		1.04	0.7	0.98	1.11	0.453971	1.20638	2.74235	0.351101	0.583589	1.93356	0.679456	1.5984	1.16067		3.64	1.55856	1.3	0.868698	2.54618	0.519816	0.909063	0	4.39655	1.22035	6.48371	0.99	0.47	0	1.77	0.32	0.63	0.48	0.62	0.71		8.78	1.57	10.07	23.06	2.7	0.74
ASIC2	-103		0.922937	0.938588	0.979182	0.753683	0.346033		1.17	0.94	1.12	1.13	1.09759	1.71485	1.92762	0.688299	0.22351	1.90003	0.641586	1.29059	1.09621		3.83	4.40769	1.83	1.49077	1.41507	0.51926	2.18464	0	2.02564	1.53087	2.57024	0	0.67	0	1.43	0.6	1.01	1.98	0.95	0.7		4.97	0.66	25.62	14	3.8	2.67
ASIC2	922		0.6526	1.32313	0.644354	0.197743	0		0.38	0.4	1.19	0.93	0	1.25874	1.27738	0.488505	0.331624	0.532735	0.555418	0.615675	0		2.2	1.59868	2.9	2.72338	2.39389	0	1.47472	0.725595	0	1.72815	0	1.13	0.77		2.99	1.36	0.39	0.74	1.4	0.47		4.38	0.87	16.5	32.43	0.68	2.94
ASIC2	986		0.715758	0	0.919798	0.219365	0.411763		0.19	0.15	1.69	1.85	0	1.31039	0	1.72293	1.6106	0	1.42589	0	0		2.14	0	0.79	0	0.304812	0.617814	0.48604	0.804673	0	1.59634	0	0	0.57		3.06	0	0	1.05	0	0.45		6.13	0	8.44	28.79	21.94	2.89
CDH4	-648		8.36449	8.96211	7.67723	6.33368	9.11335		8.47	9.4	6.52	6.34	7.73428	17.7301	4.62779	13.776	4.91789	4.64817	28.4405	4.48968	4.44998		6.86	52.2998	9.44	6.13245	4.97735	7.91124	4.52073	1.94273	4.75006	10.1627	2.39871	25.41	6.93	2.49	6.79	4.05	1.38	1.17	8.09	6.35		23.78	4.18	16.83	1.86	6.79	18.55
CDH4	-572		0	0.92695	0.379699	0.307679	0.829662		0.59	0.42	0.49	0.39	0.804003	0.46378	0	0.542485	1.07957	0.46101	0.87044	0	0.613029		1.85	0	0.92	0.963477	2.74238	0.53531	1.56708	0.182623	4.82788	1.01793	2.51001	0.3	0.18	0	1.75	0.49	0.26	1.04	0.5	0.99		5.62	0.89	22.38	0	1.49	1.07
CDH4	-515		0.620702	1.92307	0.901356	1.64414	0		0	1.09	0.96	3.34	0	0	0	1.25353	1.27043	0.779675	0	0	1.64057		6.6	0	12.7	3.87173	4.68355	1.07551	3.71114	0.689969	1.94509	3.94148		1.78	1.66	0	3.94	1.39	0	0.79	1.27	1.91		3.34	1.9	20.41	3.46	5.94	4.51
CDH4	107		0	1.26172	0	0	0		0	1.24	0.62	2.26	0	0	0	1.23255	0	2.74214	0	0	4.05555		1.23	0	0.68	0	0.588323	0	2.7652	3.13711	2.49801	0		0	0	0	0.97	1.02	0	0.58	0	0		3.19	0	10.49	2.34	1.38	2.02
CDH4	168		0.158645	0.21268	0.500274	0.168298	0		0.69	0.49	0.92	0.86	0.431459	0.54648	0	1.65341	0.425829	0.60311	0.450511	0.29621	2.56436		8.56	0	1.43	0	1.61851	0	1.64106	0.524615	1.94509	0		0	0.13	0	0.95	1.55	0.2	0	0.49	0.38		3.91	0.39	24.37	0.4	1.94	0.66
CDH4	309		0.253295	0.21247	0.39561	0.279792	0.233218		0	0.38	0.63	0.36	0.496782	0.34978	1.06617	1.00474	0.204625	0.539753	0.522555	0.248095	1.00138		1.46	0	0.81	0.17576	0.418645	0.10263	0.443469	0.198338	1.31959	0.34326	0	0.94	0.13	0.29	0.82	0	0.18	0.29	0.29	0.23		3.54	0.34	6.7	0.15	0.5	0
CDH4	440		0.65536	0.789748	1.5647	0.445053	1.70654		0.8	1.43	1	1.26	0.99727	2.12684	2.08547	2.05106	1.43341	1.36556	0.769296	0.795488	1.74842		7.58	0.456987	3.54	0.531104	2.35812	1.02551	2.73469	0	5.00839	1.32733	5.07099	3.25	0.78	0.3	3.3	1.88	0.66	1.58	1.41	0.8		10.2	1.04	38.46	1.26	6.72	1.69
CDH4	710		0.172693	0.502573	0.238754	0.418359	0		0.29	0.61	0.51	0.54	0.747015	0.340797	1.84507	1.98648	0.539507	1.95823	1.14784	0.497004	0.769801		0		3.26		2.81144		1.45754	0	5.29145	0		0	0.53			0.51	0.18	0.79		0		5.86	0.21	6.69	0	1.13
CDH4	783		0.485042	0.774954	0.623463	0.198722	0.306059		0.53	0.4	1.35	2.15	1.23581	1.6041	1.94563	0.777305	1.47984	0.427132	0.804596	0.641409	1.50261		7.35		0		3.03549		3.38431	1.33753	2.69993	0	0	0	0.43		0	0.38	0.55	0.56		0		5.54	1.33	22.69	0.65	6.18
CDH4	983		0.125847	0.305445	0.538623	0	0.367357		0.28	0.28	0	0.7	0	0	0.882817	0.136183	0.297413	0.715692	0.541801	0.512961	0.143877		1.15		5.99		1.21162		1.2026	0.739138	3.38211		0		0			0	0.09	0		0		5.21	0.17	9.7	0.38	0.71
CDH13	671		0.796329	0.457002	0.788573	0.40773	1.45334		0.46	0.71	0.46	0.51	0	2.55167	0.429493	0.77186	0.528701	0.718364	0.869025	1.14225	1.79249		4.96	1.54557	3.43	8.18064	1.96394	1.26658	1.30758	0.430727	7.78538	1.10775	3.53702	0.61	1.02	0.4	2.81	1.41	0.42	2.94	0.35	0.76		9.09	0.5	7.81	6.6	1.51	1.2
CDH13	807		0.486057	0.811409	0.465204	0.410872	0.664069		0.24	0.51	0.77	0.84	0.4384	0.581044	2.64099	1.00845	0.810819	2.30787	1.07777	1.03613	1.20138		2.04	2.02136	3.38	0.901852	1.00846	1.49758	1.17397	1.22794	2.71995	1.254	5.91704	0.78	1.24	1.28	2.86	5.45	0.77	3.15	0.97	0.36		7.7	0.21	8.99	29.76	1.55	2.57
CDH13	903		0	0.302661	0.381655	0.357752	0.284174		0.42	1.14	0.96	1.07	0	2.10111	1.47238	1.31333	0.564279	0.783967	2.5976	2.51321	1.61831		1.41	1.74057	1.57	0.979935	2.15928	12.5798	1.38539	1.02317	5.71759	0.848119	1.02935	1.33	0.68	1.93	0.27	2.03	0.25	2.79	0.77	0.57		5.87	0.78	22.85	0.82	3.39	1.67
CDH13	973		0.63976	0	0.38736	0.301891	0.51565		0.38	0.65	0.61	1.14	2.55346	2.65166	1.01581	1.69653	0.786895	4.89536	0	2.27461	2.78522		2.75	1.59882	1.99	2.78015	5.79045	2.00961	1.91185	3.26414	1.65716	0.878966	0	0.99	1.56	0	3.12	1.92	0.67	4.59	1.74	0.29		5.65	0.73	5.75	8.1	5.16	2.32
COLEC12	-344		0.353049	0.378999	0.650531	0	1.0115		0.78	0.93	0.98	1.55	3.58202	2.40197	0.304855	1.11007	0.482289	2.39928	0.812986	2.26157	1.29532		5.64	2.19418	12.78	5.0349	2.96404	4.63128	2.31349	12.4839	4.83348	8.97666	0.472219	2.74	1.47	3.04	2.8	2.31	2.55	0.69	1.72	0.75		23.08	0.7	20.04	1.94	6.55	3.75
COLEC12	-225		1.0358	0.389363	0.361586	0.321227	1.53116		1.38	0.76	2	5.62	1.48847	1.10592	1.85883	0.385065	0.437442	0.76929	0.890217	1.25512	1.54173		2.07	1.05339	2.75	3.37491	5.16004	2.11892	3.96261	0.265889	2.89603	2.27428	1.48021	2.09	2.43	1.93	4.4	0.37	0.87	2.6	1.58	1.6		1.18	0.97	5.97	4.19	4.75	6
COLEC12	331		0	0	0	0.308863	0.602514		0	0.31	0	1.07	1.13739	1.14144	0	0	0.925702	0	0	0	0.850834		2.07	0	1.95	0	0.735868	0	1.90599	1.03139	5.53176	1.56051		1.09	1.13		6.45	2.02	0	1.17	1.24	0.45		8.36	0	0	8.11	0	8.53
COLEC12	394		0	0	0.240667	0	0		0	0.69	0.75	0.52	0	0	0	0	0	2.04126	0	0	0		0	0	0.94	0	1.49261	0	0.319822	1.02653	0	1.58413		0.53	0.74	0	0	0	0	0.36	0.78	0		2.21	0	2.65	2.81	0	0
CRB3	465		10.9671	0	6.86221	4.1928	6.88795		21.16	15.28			14.2978	12.8576	17.9052	9.01874	11.5358	19.4106	9.85579	16.5117	12.6519		14.92		24.28	55.6879						19.7478		14.95	10.46		76.73			0	17.81	14.37							86.63
ELOVL2	483		0.094627	0.362125	0.458856	0.441369	0		0.45	0.61	0	0.47	1.24779	2.08357	0.896106	0.238132	0.329235	1.19654	0.275884	0.237643	0.5379		0.75	0.496813	0	0	2.03826	0	1.03031	0.835541	0.782369	0.588269	0.837992	0.65	0.65	0	1.42	0.24	0.19	1.3	0	0.6		3.23	0.39	2.97	22.03	1.07	1.19
ELOVL2	709		0.441089	0.360446	0.761373	1.4044	0		0.46	1.48	0	0.75	0.812506	1.38819	2.55898	0.891838	0.399055	0.475895	1.15645	0.990857	1.89951		0.93	0.247033	3.82	3.66185	0.92807	0	1.03031	0	0.744494	1.25887	0.837992	1.01	0.16	0	1.68	0.9	0.19	0.45	0	1.36		2.45	0.59	3	7.38	2.59	0
EN2	-875		0.679879	0.670264	0.466202	0	0		0.43			0	2.57759	1.70257	1.5694	1.52658	0.250144	1.70716	0.904659	0.401995	1.71185		8.08	0	0	0	0		7.69711	0		1.51542	4.89711	4.93	0		0	0	0	3.04	1.58	1.35			0	19.11		5.16
EN2	-203		0.98671	0.772664	0.424494	0	0		1.83	0.58	1.99	0.49	0	0	3.44788	2.24881	3.29733	1.07763	1.26268	6.23929			5	7.15986	2.25	0	1.34683	0.761381	3.07061	0	2.14932	0		0	0		0		1.2	1.72	0	0.27		5.33	0	28.45	20.88	3.19	1.54
EN2	-148		1.0812	2.13296	0.496692	1.03802	0		0.77	1.42	0.86	1.32	1.0648	1.3323	2.55832	2.15062	1.1623	1.26204	1.49852	3.09658	6.17162		8.35	0	2.43	2.54244	6.72227	1.32904	5.70047	0.670843	3.13444	3.14251		1.94	1.15		2.01	0	2.52	2.37	3.42	1.27		9.8	7.54	24.15	27.67	4.71	10.06
EN2	-85		0.938867	0.828311	0.495652	0.306504	0		0	0.9	0.98	0	0.98458	1.08952	0.528664	1.06742	0.545617	1.62606	1.1082	0.599533	1.29175		1.58	0	3.07	0	4.61469	1.00837	3.72953	1.25769	8.07607	3.79807		1.48	0.75		0	0	0.54	1.79	0	0.35		8.7	0	28.48	19.08	0	7.57
ESR1	-8		0.832246	0.879496	0.0978268	0.47444	0.319739		0.41	0.22	0.75	0.43	0.704923	0.379781	1.03952	0.86647	0.129021	0.856309	0	1.2429	0.580035		4.46	0.891181	6.57	0	5.46014	0.627423	0.689241	44.2224	8.59809	0.810856	0	0	0.51	0	0.7	0.99	0	1.26	1.39	0.94		6.56	0	1.19	2.01	16.24	4.61
ESR1	81		0.424404	0.851933	1.59206	0.314313	0.664069		0.82	1.17	1.23	4.4	3.52457	1.57299	3.69489	1.38846	0.812215	0.452321	2.66221	3.72832	1.17382		4.81	2.16769	4.72	0.951479	7.35706	0.945508	5.83652	51.3086	0.636624	2.33152	2.51001	4.51	4.11	0	5.21	1.8	0.3	0.72	3.59	1.66		6.65	4.15	55.93	35.94	9.52	9.18
ESR1	480		0	0	0.228059	0	0		0			0	0.252779	0.389052	0.507626	0.69643	0.287589	1.37532	0.248672	1.27666	0.563478		44.98	0	2.62	0						0		0	0		0	0			0	0			3.29	67.1		0
ESR1	841		0.377489	0.0863993	0.122782	0.0862112	0		0.24	0.47	0.58	1.03	0.290994	0.783694	0.730298	0.39255	0.572494	1.17409	0.27704	0.266578	0.286187		56.81	0.525356	4.6	0.659196	2.32128	0.700618	1.43443	30.2338	3.12645	0.832069	1.12828	1.46	0.78	0.61	1.4	0.43	0.21	0.57	0.87	0.64		2.4	0.51	30.75	2.88	16.13	2.27
ESR1	957		0.414159	0.592144	0.506479	0.0853856	0		0.15	0.95	1.25	1.03	0.274002	1.01944	0.447595	0.710401	0.595116	0.645799	0.414552	0.606375	0.690803		66.69	1.355	20.59	1.60001	1.96586	3.29349	0.717807	52.8745	10.209	1.29331	0.87186	0.74	0.9	3.42	1.12	1.6	2.95	0.79	2.01	0.68		10.26	0.46	15.27	1.35	18.58	1.9
FBN1	389		0.0418286	0.196021	0	0	0		0	0.38	0	0.54	0.220486	0	0.246052	0	0.216076	0.222465	0	0	0.152785		0.11	0	0.63	0	0.136072	0.255637	0.134544	1.22932	0.681329	0.372327	0.560255	0.47	0.09	0	0.21	0.35	0	0.08	0.29	0.18		5.69	0.07	0	2.06	0.2	0.66
FBN1	572		0.119171	0.0906972	0	0	0.26521		0.19	0.55	0.37	1.17	0.397226	0.446886	0.244034	0.275557	0.396158	1.2404	0.314189	0	0.141133		0.24	0	0.53	0	0.987404	0	0.484167	0.624226	1.38315	0.493871	0.512484	0	0.24	0	0.7	0.47	0.09	0.43	0.51	0.37		5.3	0.07	0.59	3.93	0.52	0
FBN1	630		0.0503236	0.266958	0.227509	0	0		0.19	0.32	0.37	0.39	0.60667	0	0.376918	0.447006	0.438142	0.541781	0.382228	0	0.857084		0.24	0	1.54	0	0.79349	0.268074	0.399465	0.51288	8.07607	0.657012	2.07684	0.22	0.26	0	0.8	0.7	0	0.91	0.34	0.46		6.68	0	1.06	3.33	0.44	0
FBN1	896		0.208809	0.239033	0.21582	0	0		0.34	0.75	0.91	3.07	0.577504	1.35055	0.985976	0.404081	0.742646	0	0.176541	0.384594	0.394544		2.46	0	1.17	0	3.06567	1.04763	1.71882	0.861994	0	0.911538	0	1.39	0.37	0	1.37	0.41	0.22	2.23	1.42	0.54		6.12	0	3.79	11.25	4.48	0
FBN1	975		0	0	0.226904	0	0		0.91	1.8	1.44	0.76	0	1.3323	1.75418	0	0.555964	0	0	0	0		3.42	0	1.58		1.85368	0	1.61141	1.32261	0	0		7.64	0.7		1.7	0	0	0	0	0		5.61	0	4.16	9.71	0
GATA5	-474		1.23813	1.27297	2.1208	1.08728	0.732025		2.74	0.9	0	0.64	1.61669	2.57529	2.3564	1.82865	0.692004	1.72098	0.900281	1.58102	1.51209		2.79	1.39489	1.35	8.14929	2.13195	1.03536	3.82166	0	3.57908	16.0054	2.85559	4.01	1.09	0.6	10.26	0.2	1.25	2.58	1.41	1.24		5.96	0.98	14.22	33.63	22.55	8.72
GATA5	-280		0.661636	0.618896	1.61423	1.06562	1.46833		0.76	1.07	0.89	1.26	1.05093	1.66703	2.20312	1.85943	1.07233	1.05172	0.501758	0.917215	0.975546		0.76	1.32771	1.87	1.50317	1.90077	0.906146	2.48028	0	3.08355	1.31678	1.64529	0.8	0.38	0.9	2.07	0.98	0.44	0.78	1.2	1.23		4.64	0.87	5.15	5.15	3.63	4.24
GATA5	-34		1.0113	0.812578	1.01249	0	0.242713		0.78	1	0.47	1.77	1.66041	0.884028	3.3428	0.794065	0.846744	2.80485	0.573482	0.428977	1.22287		0	0.827449	3.66	0	6.29558	0.310666	5.42844	1.04002	6.9099	2.67983		7.48	0.62	2.89	1.29	0	0.46	2.21	1.48	1.22		3.11	0	20.49	6.94	2.79	2.6
GATA5	56		0.285432	0.55946	0.895049	0.109505	0.349422		1.02	0.68	0.61	2.49	0.528239	1.22967	2.06169	0.892445	0.469143	0.792614	0.661631	0.727867	1.10705		3.66	2.28153	17.54	0.739883	1.8354	1.21881	2.20047	1.84084	1.80832	3.37037	0	0	1.01	0	0	0.39	0.86	1.98	1.21	1.78		3.86	0.74	8.94	5.11	4.02	1.25
GATA5	180		0.606831	0	0.790974	0.471652	0.564501		0.53	0.63	1.2	1.9	1.3102	1.50912	1.86435	0.719099	0.845425	2.25268	0.347595	0.750061	0.406738		1.36	1.95275	1.84	0	1.88652	0.44533	2.26481	0	1.92128	1.34933	3.47845	0.9	0.62	0	1.73	0	0.61	0.53	2.62	1.19		1.71	4.71	33.27	5.38	3.33	1.61
GATA5	235		1.48634	0.460044	1.18995	0.376205	0.752058		1	1.01	1.74	1.44	0.402003	1.19282	4.88762	1.59019	0.872461	0.445998	1.2568	2.12827	9.61698		1.76	9.04078	1.7	0.690922	2.53205	1.88524	3.14038	0.677106	0.470919	2.05998	0	1.39	0.77	0	0.73	0.24	0.55	0.66	1.68	1.25		5.81	0.97	8.27	5	4.46	2.09
GATA5	311		2.43381	0.795289	1.17447	0.146485	0.419011		1.41	1.12	1.43	3.85	0	1.94009	1.27388	0.50808	0.889537	1.3297	0.574425	0.762589	0.850936		0.37	2.1702	3.25	1.03747	3.00192	1.65206	3.9336	0.412379	3.34904	3.25252	0	2.18	1.24	0	3.29	0.59	1.74	0.78	2.35	1.71		7.8	3.19	11.33	6.5	7.61	2.03
GATA5	678		0	0	0.978849	2.20019	0		3.28	4.38	3.96	3.87	1.97825	2.42124	5.49468	0.869032	1.33794	0.83884	1.62276	1.7973	2.62115		2.12	6.6461	14.02		3.29228	0	6.11814	2.10074	29.0483	2.90218		0	3.14		0	2.45	2.52	0	11.29	1.8		17.71	5.5	36.54		17.93	0
GATA5	712		14.8011	3.35949	1.88375	1.24786	0.932335		11.12	5.84	7.69	5.75	11.286	5.25933	7.57852	2.82984	3.32731	4.53111	2.61745	1.95283	5.46775		8.25	0	6.31	8.72465	21.843	11.3115	8.95575	4.05754		4.85546		4.21	8.67		23.53	2.45	54.66	4.97	6.98	6.36		6.26	0	50.51	14.76	26.04	25.03
GATA5	1105		7.58885	3.35949	1.81309	7.78528	4.54895		10.99				6.65517	7.82578	7.12032	5.03806	4.73115	3.79778	8.90841	2.74326	3.86397		62.05	66.2817	5.78	40.77						0		1.86	5.3		4.74	27.87	0	5.69	5.14	0
GATA5	1699		0	0	1.02302	0	0		0	0			0	3.82954	0	0	0	0	0	0	0		0	7.15986	0	0						0		0			0	2.29	0	0		4.93		0		0		7.37
GPR37	539		0.114959	0.0805354	0.173518	0	0		0.2	0.21	0.95	0.59	0	0.400794	1.40851	0.248998	0	0.364589	0.240538	0	1.10086		0.63	2.20507	0.92	0.260222	0.32724	0.23737	0.480449	0	0	0.386538	0	0	0.25	0	1.06	0	0.28	0.2	0.2	0.16		0	0.37	1.92	20.16	2.83	0.36
GPR37	661		0.405861	0.531049	0.220048	0.642962	0.398017		0.99	0.85	0.76	1.74	1.55275	0.514732	2.11762	0.466111	0.654107	0.59472	0.83644	0.951637	1.46403		6.26	3.60673	4.95	0.551516	1.96394	1.09088	1.47773	0	3.18671	1.10768	0.91612	0.78	2.37	0	1.71	1.1	1.59	1.9	1.56	0.79		4.63	1.8	33.62	76.54	3.39	3.15
GPR37	925		0.668364	0.531008	0.847605	1.37045	0.487535		1.13	0.36	0.47	0.82	2.22442	2.30637	1.93715	0.802717	0.472271	0.904818	0.88531	0.488901	1.02467		4.83	1.55927	1.38	1.90063	2.97849	2.60446	1.95457	0	2.98247	0.993191	2.07684	1.22	0.86	1.24	2.37	2.97	0.46	1.78	0.73	0.88		4.98	0.48	14.63	22.51	2.48	3.71
GPR37	979		0.896485	0.471659	0.259835	0.698966	0.578166		0.53	0.44	1.3	0.98	0.538172	0.546499	0.831421	2.1098	0.96675	1.97845	0.818017	3.26651	1.02114		26.05	0	3.78	2.08127	6.99492	0	5.51203	1.75395	4.51473	1.46596	1.30185	1.56	1.3	0	0.62	1.73	0.54	1.9	0.28	0.58		3.28	1.27	10.26	72.67	1.71	1.99
HAND2	510		1.11294	0.870547	1.07665	0.295777	1.31696		2.57	1.87	2.49	3.06	1.60875	3.62386	3.77221	2.74937	1.45386	3.19352	2.25997	2.7299	1.909		7.83	2.55771	4.42	3.41734	8.41325	4.2853	7.15597	20.0762	10.4875	6.21453	10.2661	3.58	2.47	3.11	3.03	1.83	1.43	2.72	3.63	3.2		11.1	2.97	27.21	33.72	6.18	6.62
HAND2	604		0.628702	0.44235	0.233762	0.216995	0.172902		0.76	0.79	0.86	1.25	1.78376	1.28183	1.58663	0.899107	0.730906	1.19407	0.858824	1.02256	1.09046		3.21	0.367646	2.83	27.8544	4.26647	2.21979	3.6066	2.38448	2.83117	2.89201	3.53702	1.82	0.72	0.63	0.78	0.9	0.41	1.39	1.07	0.99		9.21	1.95	6.66	50.45	2.5	2.65
HAND2	774		0.407405	0	0.489985	0.817681	0.377038		0.32	0.7	0.8	0.41	0	0.921516	1.68283	0.491789	0.488331	1.25391	0.892468	0.151995	1.24428		0	0	5.71	8.72465	2.75064	0	1.47468	0.868872	10.0511	2.22376		0	0			1.44	0	5.91	0	2.02		5.75	0.68	9.69	7.99	0
HAND2	875		1.00129	0	0.200104	0	0		3.58			0	0.625622	0.962305	1.98887	0.292518	0.568347	0.707758	2.32188	0.457199	0.657289																					0			0	13.91		0
HAND2	1206		0	0	0.401678	0	0		0.56				0.296154	1.40282	2.26658	0.27199	0.743989	1.34164	0.857763	0.445725	0.650074				0	11.3013								9.75			0	0				0			0	0		1.65
HOXC12	27		0.426413	0.92152	0.32854	0.520054	0		0.45	0.69	0.28	1.1	0.543043	1.78532	1.54235	1.36675	0.451189	1.05404	0.336341	0.983019	0.640949		2.02	2.60706	2.23	2.31803	1.37568	0.942372	1.69374	0.50662	6.70213	1.4159	0.864786	1.24	0.8	0	1.54	0.71	0.45	0.67	1	0.72		3.76	0	4.24	1.44	3.15	1.54
HOXC12	111		2.43688	2.22306	1.99776	1.59382	2.11569		4.32	3.33	3.16	5.45	3.58715	4.01565	4.89908	3.01617	3.31189	5.9011	2.75182	2.90474	2.93784		7.27	7.64436	15.7	38.567	12.2091	13.0599	9.44311	4.09587	13.0382	5.72015	5.17592	3.12	5.52	38.63	6.51	2.17	3.36	17.5	6.5	6.21		12.6	1.27	31.97	59.09	29.61	9.31
HOXC12	347		0.837161	0.734413	0.421511	0.420551	0.538961		2.5	1.23	2.29	3.35	3.6895	5.79191	3.25567	3.15155	1.56154	3.0968	4.10633	2.25229	2.37249		8.38	5.6651	4.1	9.96205	6.10708	6.17183	7.88508	2.42875	15.3167	3.86143	7.0386	5.3	1.84	0	7.77	3.82	2.61	3.39	1.03	2.42		6.8	1.49	12.63	27.05	6	5.14
HS3ST2	-1211		0.183567	0.644926	0.571089	0	0		1.19	0.39	0.36	1.6	1.28333	1.84026	1.49081	0.212375	0.532141	2.69427	1.52462	0.524741	1.54109		10.7	0.222682	1.17	0.680015	0.727033	0.135569	2.60417	0	1.55259	0	2.15976	4.58	0.71	0	1.94	0.78	0.1	0.82	0.81	0.77		3.56	0.26	2.59	11.07	1.22	1.44
HS3ST2	-1119		0.903856	1.2725	1.08704	1.28591	0.834501		0.84	0.19	0.24	1.06	1.77841	2.88952	1.549	0.441644	0.807083	1.48159	0.963946	0.840065	1.80113		2.33	2.50822	2.64	0.67734	2.87146	0.541285	3.33233	0.874114	3.26029	1.84509	2.39924	0.67	0.57	1.46	5.33	1.48	1.69	1.5	1.21	0.84		11.43	0.53	28.48	64.42	3.88	6.83
KCNMA1	-368		0.1576	0.0784441	0.270509	0	0		0.16	0.11	0.51	0.35	0.49555	0.212025	0.914461	0.167843	0.193134	1.61437	0	0.631276	0.134102		1.29	0	0		2.73424		0.934403	1.38428	2.82399	1.47266	2.11707	0	0			0.39	0.19	0.4	0	0		4.32	0.37	1.04	1.59	2.9	0
KCNMA1	-210		0.106526	0.235148	0.330949	0	0		0.72	0.31	0.49	0.84	0.81119	0.870357	0.961219	0.347784	0.295268	0.232162	0.16499	0.515443	0.424225		1.14	0	0.76		0.58583	0	1.20725	0	2.09273	0	2.29686	0	0.18		0	0.78	0.06	0.26	0	2.2		0.82	0.46	1.34	2.68	1.22	0
KCNMA1	-106		0	0	0.308995	0	0.771458		1.45	1.47	4	1.85	4.84268	2.16483	12.9449	2.39509	2.41998	0	0	3.84062	0		26.66	6.20114	4.84	0	31.0133	1.72636	9.30961	2.8221	5.07534	10.2106		2.15	3.17		7.94	0	0	1.02	1.37	0.54		3.39	9.25	3.69	23.78	8.22	9.1
KCNMA1	-43		0	2.90318	0.206237	0.717688	0		0	0.72	0	0	0	0	4.07769	0	0	1.29616	0	0	0		0		1.14	0	5.54147	0	0	0	4.51473	2.43035		0	1.2		0		0	1.23	0.72	0		3.32	0	0	0	2.81	0
KLF14	497		15.9925	16.8646	16.3443	15.8496	15.1221		27.12	20.54	18.6	25.95	18.8251	30.3477	28.047	20.512	19.086	24.0314	19.7662	24.8284	22.4424		53.89	7.13378	65.16	17.268	60.6771	29.8227	29.1691	5.37426	35.5251	26.6845	40.4295	28.45	29.25	94.05	31.49	9.19	10.76	81.3	31.61	20.1		44.62	44.93	62.66	51.2	62.96	36.72
KLF14	626		7.9818	10.5295	6.01916	4.70814	3.89139		15.39	10.11	7.24	15.05	19.0835	14.7221	13.3163	6.58198	7.1984	12.3089	8.86804	12.2162	8.9832		12.87	5.04848	42.82	39.3347	19.606	12.1542	21.4265	2.76484	28.8041	13.3468	18.9435	5.01	28.93	14.54	10.76	12.24	7.06	35.22	14.46	10.51		16.18	36.98	22.2	10.59	18.57	14.7
KY	-183		0	0	0.257271	0	0		0				0	0.321543	0.444458	0.407435	0	0.224025	0.431786	0.226525	0.210296		0	0	0	0						0		0	0	0	0	0		0	0	0				0
NTPX2	-656		0.938867	2.1617	2.32529	1.43434	2.53517		1.85	1.96	2.66	3.7	4.81195	4.69672	4.89824	2.63581	1.75425	0.931114	7.53161	4.03586	1.01054		34.61	0	11.67	6.21105	5.92099	13.7822	7.91905	4.87499	4.74944	0	0	6.14	2.29	0	5.64	3.97	1.91	1.58	3.37	1.24		11.2	13.69	12.58	2.45	4.35	3.94
NTPX2	-590		4.35017	5.09354	2.96297	3.78666	2.52399		5.55	3.48	3	10.31	16.7178	7.21775	7.44812	5.36085	3.33124	7.58778	3.19049	7.91543	8.46916		21.44	3.43919	10.49	13.2038	13.1273	44.2859	17.8815	7.46468	9.58587	16.1886	26.4717	12.01	6.34	0	16.01	9.12	5.16	6.96	9.47	6.23		0	7.91	46.83	24.81	26.39	22.01
NTPX2	933		1.31351	0.465537	0.904439	0.627878	0.318316		0.94	0.87	1.14	1.23	2.07674	1.52844	2.14849	1.37356	1.19114	2.93315	0.227516	2.31319	1.41023		4.56	1.27735	2.35	2.15128	3.46647	1.1422	2.14679	8.55727	5.62337	2.18702	4.31298	2.49	0.92	4.02	3.16	1.2	2.79	2.29	1.24	2.25		4.36	1.59	18.96	26.77	5.29	4.06
NTPX2	1046		0.728097	0.767933	0.891358	0.639554	0.932416		1.92	1.41	1.15	2.66	0.837659	1.60006	2.04593	0.909832	0.308162	2.51101	0.99009	0.927858	0.43674		4.35	2.02834	12.4	1.39367	3.80974	2.02651	2.29709	1.36548	3.25201	2.44509	1.26157	1.78	0.93	1.74	1.03	0.19	0.53	1.59	1.04	1.22		12.34	0.85	15.71	8.01	3.71	3
PA3	178		0.207734	0.361732	0.396091	0.824669	0.578166		0.88	0.84	1.81	1.5	0.442928	1.76554	1.39751	0.735575	0.713521	1.26053	0.508701	0.361955	1.04474		3.13	42.7982	1.95	3.53423	1.35849	4.86082	1.86837	1.94161	2.71963	1.21517	1.25664	0.97	0.78	1.42	2.09	1.1	0.86	1.13	0.34	0.3		5.1	0.7	4.3	7.24	2.97	1.78
PA3	412		1.02531	0.776394	1.93464	2.52288	3.14845		2.63	1.38	3.01	2.93	1.12052	6.10088	7.09932	2.97691	1.89124	3.39869	1.4915	2.1004	3.8668		68.15	5.18947	21.36	11.4374	3.46644	10.1039	5.23877	0	13.5361	3.99006	7.17137	1.49	1.21	5.21	7.25	6.14	3.05	3.53	1.87	1.73		16.5	1.46	33.32	24.57	13.51	4.86
PGR	770		1.62601	1.71664	2.06453	1.87815	1.33999		1.61	1.11	2.67	3.28	2.50244	5.69256	4.90583	1.08713	1.25998	2.14038	1.30966	4.28616	2.10796		3.28	39.6252	4.23	3.20898	15.1547	2.66316	6.26422	2.72791	4.81199	6.05653	13.0567	4.52	1.53	13.08	7.11	0	0.5	9.69	4.01	2.02		5.04	10.28	27.38	15.01	4.87	5.96
PGR	852		1.49465	1.59439	1.45196	1.02119	1.89663		2.81	2.11	2.39	2.96	1.78154	2.99676	2.69819	1.73734	1.24249	1.85068	2.53324	1.83205	2.21651		3.46	4.84825	19.32	7.72214	2.85825	10.9127	3.8383	0.35784	2.71973	4.23126	3.10329	5.31	4.76	5.39	3.98	0.65	1.25	23.75	2.14	2.11		6.96	1.19	8.63	48.79	21.38	21.29
PGR	1114		2.93583	1.99251	2.76203	2.72579	1.31332		3.41	3.31	2.6	2.66	2.60967	4.62889	2.9379	4.61193	1.4479	4.10946	1.82214	2.02884	24.0154		5.37	3.04969	4.84	37.7649	3.63485	2.43437	7.13251	1.99317	9.14161	10.6078	6.21665	3.24	3.51	2.59	8.02	0.38	1.29	2.55	2.44	2.51		6.89	1.63	37.11	30.44	7.88	15.23
PGR	1301		1.50697	0.597647	1.52869	1.03581	1.40119		1.34	1.65	1.46	2.88	2.23188	1.47199	1.68815	2.08329	1.30844	1.86173	1.14922	1.04745	1.65834		26.84	3.80384	2.75	5.89521	3.44339	0.667754	3.14692	2.56312	2.07005	3.07491	3.95789	2.67	1.92	2.47	4.31	0.38	0.89	2.82	2.09	1.6		6.67	1.69	20.5	12.67	25.39	5.83
PRDM5	-73		0.207345	0.149588	0.860186	0.492877	0		0.43	0.29	1.02	0.13	0.464503	0	0	0.50702	0.150019	0.692424	0.28026	0.344033	1.28014		25.1	0	2.57		0.169114		0.311237	0.849397	1.55266	0			0		0	0	12.03	2.73		0		0	0.93	32.24	50.3	0.99
PRDM5	58		0.149235	0.18669	0.38158	0	0		0.11	0.62	0.77	0.07	0.117215	0.377988	0	0.707595	0.271293	0.308814	0.481237	0.272329	0.598621		4.87	1.0579	0.42	0.595884	0.225544	0.335612	0.372809	1.37525	1.3102	0.543741	0	0.53	0.08	0	0.35	0	0.52	0.97	0.31	0.33		3.24	0.22	11.66	32.76	0.65	0
PRDM5	243		0.0738224	0.130205	0.115585	0	0		0.14	0.26	0.31	0.23	0	0.29101	0	0.370534	0.109193	0	0.774919	0.35006	0.506461		4.07	0	0.54	0	0.119607	0.212415	0.257132	0.388131	1.18713	0.366781	0	0	0.05	0	0	0.32	1.05	0.54	0.12	0.11		2.26	0.1	13.35	8.98	0.39	0.57
PRDM5	295		0.0716248	0.209845	0.491515	0	0		0.13	0.43	0.18	0.7	0	0.19491	0.46898	0.958077	0.0819178	0.629537	0.657932	0.105741	0.477216		3.44	0.700997	0.28	0	0.0467691	0	0.281475	0.245095	2.25667	0.142944	0	0	0	0	0	0.5	0.78	0.26	0.07	0.2		0.54	0.14	15.36	5.95	0.38	0.17
PRDM5	422		0.0782852	0.353673	0.579919	0	0.395815		0.24	0.28	0.2	0.67	0.303798	0	0.503348	0.647437	0.291898	0.249048	0.367123	0.463839	0.972743		18.01	0.58095	1.27	0	0.666135	0	0.241361	0.217772	5.13485	0.252525	0.939918	0.31	0.1	1.15	0.79	0.8	2.99	2.88	0	0.17		4.55	0.6	36.93	49.68	0.97	0
SOX11	-1123		0.850545	1.07482	0.555109	0	0		1.7	8.79		0	3.8998	4.86757	4.07824	3.68945	2.50423	3.79767	3.52883	3.90484	3.61735		26.14	3.23894	4.94	12.5445	12.8211	0	5.77873	44.1753		2.88111	16.1814	4.84	2.45	26.55	1.84	1.73	6.13	5.56	1.88	0.84		7.52	8.53	44.46		25.57	11.41
SOX11	-835		0.692478	1.00124	1.06735	0.330487	0		2.4	1.4	0.76	3.36	3.29987	5.90322	5.33044	4.08885	2.28093	1.4247	2.0295	5.76154	3.08141		19.58	6.34655	6.32	7.23657	10.4459	0.579426	6.28987	33.8543	6.62498	5.21988	4.89711	3.45	11.23	5.92	5.27	2.22	3.23	4.01	1.32	2.08		19.19	8.59	37.55	44.86	9.16	15.48
SOX11	-780		0.623572	0	0.247645	0.341028	0.784186		1.63	1.09	0.98	2.14	4.68526	4.26714	2.91374	2.16135	0.693552	3.53431	0.548513	3.58373	2.89907		6.52	34.5075	8.43	4.70477	6.54408	1.29129	4.23158	6.36656	1.82967	1.01545	2.39871	1.19	1.44	3.73	1.7	1.6	4.63	3.25	1.96	1.11		5.66	3.82	19.54	17.04	4.31	2.78
SOX11	-699		2.86968	2.3494	1.65609	1.5284	3.3876		5.57	2.4	3.12	7.36	12.0103	8.57009	9.95392	7.68135	4.86674	4.63739	3.95526	6.24367	8.10433		79.58	37.857	16.06	35.2121	17.846	8.8111	22.4876	7.19574	9.89584	8.35594	11.9058	7.25	7	20.37	13.68	4	13.74	16.19	8.27	6.62		19.36	20.31	49.8	96.79	58.91	20.49
SOX11	-656		0	0	1.35549	0	0.970361		1.35	1.27	0.71	1.72	7.69668	0	5.99163	0	5.96542	3.83982	0	0	6.88828		9.66	7.98722	13.33	0	7.26788	1.08026	6.582	5.71573	3.49161	1.99763		3.81	2.28	0	0	0	16.74	17.58	3.26	1.73		29.18	5.43	39.63	72.11	25.57	3.79
SOX11	-621		0	1.58219	0.981993	0.207456	0.759218		0.32	1.24	2.08	2.87	3.57371	0	0	8.42592	0	7.12101	0	12.6773	8.97879		3.56	18.2667	6.72	4.95827	4.86844	3.44256	2.48518	5.455	2.66062	1.62107		1.09	0.86	0	8.85	1.92	4.25	1.45	2.31	1.43		4.42	2.02	11.16	18.96	4.05	5.07
SOX11	-570		3.9681	0.943308	1.50822	1.07852	2.74598		5.86	4.15	5.92	10.67	8.70007	11.7175	6.4226	12.2961	6.2382	3.30962	12.8164		5.58563		75.38	15.6253	16.8	16.058	21.929	4.23666	17.2905	9.39706	11.4628	11.5662		5.13	8.94	7	15.43	1.5	10.07	7.55	11.84	6.75		28.78	43.91	45.87	80.27	24.16	19.43
SOX11	-524		2.50377	0.581774	1.10499	1.02261	1.4244		4.29	2.83	2.96	7.43	6.33483	2.90818	7.20442	2.73149	2.33294	3.29163	2.5059	2.84068	4.59311		29.6	7.35312	11.45	16.8418	11.8805	5.29793	9.8424	52.3262	3.93811	7.41641	18.3807	4.17	2.61	0	10.02	1.73	6.96	2.69	4.1	5.24		12.23	7.83	29.59	24.24	24.16	6.79
SOX11	-204		0.235572	0.129058	0	0	0		0.83			4.4	1.86513	1.21092	3.66023	0.644603	0.569922	2.3843	1.33272	3.26007	2.99688		6.64	17.599	20.84				10.3731			3.84505		2.58	3.91		7.94	0	0		2.03	3.9			11.68	17.79	29.36	39.39	0
SOX11	25		0.809883	1.48481	0.387257	0.241843	0.434261		1.56	1.22	1.81	3.59	4.75027	6.82639	2.93771	3.05932	3.07964	3.71107	6.18533	4.45848	1.57519		12.76	9.51309	42.11	6.11126	7.65326	3.90632	7.30725	13.3547	2.91291	2.90964	7.3667	6.86	2.26	2.4	5.23	5.13	3.66	5.33	2.24	2.63		4.78	3.02	33.8	59.97	11.22	4.38
SOX11	101		1.21172	0.828345	1.52489	2.16731	1.31531		1.23	1.85	1.59	3.26	3.60057	3.93633	7.39445	3.40338	3.43289	2.75554	1.93386	2.6999	4.96535		10.19	45.2626	6.29	10.3956	7.96608	6.58853	4.63543	1.80275	8.07678	4.05636	8.5281	3.7	19.99	14.85	5.36	1.57	30.53	2.71	3.98	3.7		9.44	3.45	30.04	13.33	10.01	9.27
TLX3	-691		0.528025	1.40174	1.60824	2.54307	1.80093		1.57	1.73	1.35	1.56	0.712448	1.03077	5.05284	1.8912	1.48849	1.59894	0.87044	1.39473	2.68043		6.33	10.6863	3.94	3.71526	3.25059	2.15955	5.84327	1.69927	8.47449	2.82935	2.29686	0.43	1.6	0	1.75	0.88	2.2	0.73	2.31	0.54		7.52	0.44	18.02	10.38	4.82	5.5
TLX3	-588		1.44342	1.90474	1.7692	1.77131	3.26894		5.54	4.12	3.83	7.57	5.28027	12.2372	11.2633	7.00795	5.53643	6.93306	3.48204	9.11115	6.71825		75.6	23.6701	12.6	40.0911	12.9655	40.3406	10.5417	6.37861	25.7047	22.2435	11.5455	7.78	7.24	4.39	24.15	5.29	31.19	5.54	11.07	5.15		16.44	9	45.78	84.25	17.91	12.15
TLX3	-513		1.43643	0.444315	1.06919	0.724208	1.14664		2.29	2.28	2.96	2.85	4.52397	4.97377	5.37629	2.94707	3.17732	2.98114	0.577214	1.88184	2.50988		7.17	57.2192	4.14	14.4832	5.88971	6.94794	6.12882	14.4292	9.47623	6.32377	7.67722	3.01	3.11	4.22	3.41	18.98	0.38	2.05	4.53	3.88		7.68	0	32.15	55.18	12.09	6.57
TLX3	226		0.620853	1.08478	0.441008	0	0.997329		1.89	1.15	1.64	2.04	2.29451	5.57299	3.99727	2.02282	1.39704	2.31803	1.88905	1.64733	2.81869		8.46	5.61842	4.35	3.29423	5.39201	3.55055	4.42929	10.2309	5.64048	5.21994	0.956539	2.42	1.74	43.09	6.21	0	1.52	1.76	2.74	1.72		11.17	2.75	37.91	21.33	6.48	5.19
TLX3	373		1.22252	1.0458	1.46412	0.618196	2.12159		2.56	2.68	1.85	2.81	2.993	4.06432	4.68799	1.91043	1.4612	4.24707	2.48582	1.47263	3.39458		15.98	7.99896	4.71	11.6965	5.33039	5.07532	7.29717	10.3178	9.32687	5.40036	5.44947	8.61	1.73	4.21	5.62	1.46	1.06	2.93	3.85	2.68		6.28	1.18	29.98	66.88	14.04	1.77
TLX3	634		0.125924	0.390242	0.339591	0.215246	0		0.26	0.61	0.23	2.24	0.634555	2.35125	0.805193	0.803978	0.264029	0.854421	0.327601	0.257555	1.19712		31.44	4.24307	4.23	3.62727	4.08144	0.975962	2.83864	5.09268	8.79852	1.36037	4.17936	1.44	0.7	1.31	2.05	0	0.32	1.14	0.57	0.69		4.62	0.22	21.78	11.72	16.5	2.3
TLX3	690		0.590958	1.57723	1.5359	0.855461	0.61025		2.08	2.87	2.06	4.03	3.39066	1.22026	3.76337	0.74046	1.62407	1.7245	1.66655	2.47433	1.53754		13.36	5.31491	1.84	13.4429	3.04784	2.47049	4.43183	12.8261	4.2082	12.1423	1.07007	2.98	2.58	2.2	0	1.73	0.38	0.42	3.52	2.5		12.41	1.57	11.16	16.44	5.32	5.42
TLX3	968		0.596395	0.262154	0.149234	0.489868	0		0.15	6.74		0	0.623683	1.72954	1.52727	0.1093	0.152196	1.34875	0.361857	0.605451	1.35283		5.49	2.2951	1.79	0	1.416	0	0.978705	15.3612		2.77017	1.21419	3.17	0.28	1.34	0.68	0	0.14	0.53	1.99	0.87		0	0.53	18.93	16.73	1.07	0
TLX3	1708		0.864631	1.27877	0.763075	1.48047	0.469936		1.07	0.96	1.55	1.82	1.25125	1.13886	2.9155	0.62334	0.304269	0.645068	0.518459	0.493178	0.756245		19.03	0.573166	6.68	1.20904	0.710133	1.93382	0.709608	0.321406	4.57348	0.876233	0	1.12	0.45	0.25	1.09	0.55	0.39	0.69	0.84	0.74		9.4	0.18	4.25	3.46	4.28	4.08
TLX3	1858		0.284877	0.265706	0.436293	0	0.458397		0.36	0.32	0.92	0.81	0.617436	0.468712	1.38596	0.372728	0.222782	0	0.0766145	0.49633	0.847903		0.84	0.203484	0.75	0.171687	0.425934	0.380668	0.504527	0.530583	1.37038	0.632736	1.69699	0.33	0.4	0.36	1.01	0.64	0.18	0.15	0.54	0.42		3.67	0.23	18.71	8.15	1.16	1.26
TMEFF2	-351		0.3092	0.380135	0.732409	0	0.404774		0.8	0.34	2	0.49	0.94733	0.814742	1.20142	0.394349	0.398087	0.277929	0.542471	0.364847	0.535472		0.19	0.116956	1.6	0.286884	0.275851	0.226502	2.10643	0.837147	2.04228	1.28416	1.24221	0.09	0.2	0	1.3	0.24	0.12	0.7	0.67	0.43		5.47	0.65	2.92	23.75	2.63	0
TMEFF2	-107		0.0900233	0.166567	0.35286	0	0.246902		0.03	0.51	0	0.51	0	0	0.168508	0	0	0.132982	0	0.0892157	0.171604		0.06	0.0555973	0.87	0.189076	0.379822	0.116653	0.312357	0.220528	4.51772	0.186263	0	0.28	0.08	0	0	0.37	0.12	0.82	0.13	0.04		2.21	0	0.15	0.14	0	0.17
TMEFF2	-50		0	0.254924	0.16794	0	0		0	0.27	0.57	0.53	0	0	0	0	0	0	0	0.861124	0		0	0	0.3	0	0.114683	0.238067	0.198043	0	0.762962	0	0	0.93	0	0	0	0.52	0	0	0.34	0.09		2.92	0	0.8	0	0	0.43
TMEM229A	217		0.125188	0.51439	0.480717	0.451298	0		0.35	1.51	0.52	0.69	2.35218	0	1.69612	0	0.365383	0.40978	2.05792	0.800791	2.82992		9.94	0	3.4		5.97745		2.74881	0	4.90829	1.43235	6.33093	0	0.83		0	0.47	0.59	1.28	0	0		5.49	1.38	14.97	17.94	4.2	9.1
TMEM229A	351		0.668158	0.346301	0.605532	2.25383	0		0.46	0.91	1.14	1.53	2.83296	1.97235	4.68099	0.277108	1.0128	1.75081	0.784094	0.796799	2.05514		25.77	0	1.47		8.61117		2.84152	1.32263	5.33096	0	4.31161	3.76	0.56		3.47	1.01	0.89	1.58	0	0		5.43	1.13	35.59	63.37	6.89	9.59
WT1	153		0.121331	0.184132	0	0	0		0.34	0.75	0	0.98	1.24603	2.47967	0	1.08708	0.323754	1.63992	0	2.34136	1.55866		0.92	0.253108	4.15	0	1.03694	0.265435	1.65059	0	9.47775	0.544874	5.1301	1.42	0.3	0.47	1.56	1.7	0.95	1.89	0.45	0.38		7.22	0.38	2.23	0.39	2.18	0.44
WT1	302		0.145717	0.13432	0.515695	0	0		0.15	0.39	0	0.43	0	1.80889	0.383391	0.893624	0	1.48728	0	0.365251	1.1941		0.87	0.248357	0.83	0.173633	0.70784	0.262277	0.763704	0.402101	1.49408	0.54093	0.89335	0.49	0.35	0	0.54	0.51	0.37	0.13	0.42	0.25		3.96	0.05	0.68	0.16	0.81	0.85
WT1	527		0.613703	0.422288	1.30422	0	2.58009		1.39	0.52	1.47	1.87		2.97314	1.62653	1.2644			1.05836		0.560783		0				2.35194		3.26358	0	1.41006		0	0	0.67		2.79	0.51	0.47	0.96		0		5.38	0.36	5.11	0.57	2.77
ESPNL	100		38.4363	35.1817	39.8727	30.7757	58.6056		6.3	18.8	17.03	20.89	10.2657	10.6428	11.5744	22.5592	25.0926	23.9971	17.8227	18.7709	12.6308		4.42	19.3398	50.36	18.5137	16.1563	10.2654	35.7493	59.0132	16.0543	37.4877	17.7825	44.33	5.02	60.55	19.33	4.1	14.45	7.18	23.81	9.68		15.87	6.81	22.56	3.98	66.22	10.11
ESPNL	196		78.7698	77.3154	84.7932	70.6507	86.2034		26.8	53.02	51.25	60.4	74.5075	58.0326	61.0185	51.1327	72.6078	80.2702	70.5593	55.0296	56.6963		8.96	91.913	79.27	62.7804	43.0423	42.8682	85.3589	92.9274	60.4796	85.5117	79.075	88.75	37.87	96.18	73.82	45.54	65.55	34.49	62.08	50.9		53.22	18.54	56.53	56.63	96.46	54
ESPNL	243		93.6378	90.1806	93.5347	92.5145	97.7695		41.38	93.97	90.05	88.14	88.2275	84.7932	82.7359	84.053	87.6426	93.3846	85.7734	80.4287	81.1932		49.21	98.1546	94.62	89.3071	57.8769	88.7303	96.3507	98.954	85.2306	97.6466	79.8129	94.77	85.85	99.96	87.97	77.83	88.36	89.14	90.05	85.93		89.4	22.92	68.59	41.82	95.27	79.82
[truncated: 88 more columns]
