# Supplementary material for: Age-related epigenetic drift in the pathogenesis of MDS and AML
Source: HighWire-hosted journal article supplement (doi:10.1101/gr.157529.113), 2014-01-10
Supplement: Supplemental_Information.docx [file Supplemental_Information.docx]

**Supplementary information**

**Supplementary Fig. S1.**

DNA methylation analysis of candidate genes in MDS mice. These 3 genes were chosen because their human homologous genes were reported as hypermethylated in human MDS. Shown are the percentages of methylated cytosines in the samples as obtained from pyrosequencing analysis. Each dot corresponds to one animal. The bar in the graphs represents the median.

**Supplementary Fig. S2.**

DNA methylation analysis in MDS mice. Shown are the percentages of methylated cytosines in the samples as obtained from pyrosequencing analysis. Shown are all of the genes analyzed except the 5 genes in Figure 2A and the 3 genes in Supplementary Figure S1. Gene selection is described in the text. Each dot corresponds to one animal. The bar in the graphs represents the median.

**Supplementary Fig. S3.**

Methylation profiles of hyper- or hypomethylated genes with age in mouse bone marrow and spleen.Association of the percentages of methylated cytosines in the samples as obtained from pyrosequencing (y-axis) with age (x-axis) for 41 genes. Red dots and line, and blue dots and line indicate spleen and bone marrow, respectively.

**Supplementary Fig. S4.**

Hierarchical clustering analysis of methylation markers in all mouse samples studied. Color codes are on the left bottom. The bar graph on the top shows the methylation % of LINE-1 by pyrosequencing analysis.

**Supplementary Fig. S5.**

Hierarchical clustering analysis of methylation markers in mouse. (A) Hierarchical clustering analysis in normal bone marrow. Green to red cells indicated the range of methylation percentage from 0 to 57.3. The color code for age is listed on the bottom. (B) Hierarchical clustering analysis in normal spleen.

**Supplementary Fig. S6.**

DNA methylation analysis in human MDS patients. (A) Number of hyper- and hypomethylated genes detected by MCAM assay. All 19 patients were categorized into CIMP-positive or CIMP-negative based on MCAM data. (B) Differences of methylation % of 9 genes (10 genomic regions) between CIMP-positive and CIMP-negative patients. Averaged levels are shown on the right side. The bar in the graphs represents the median.

**Supplementary Fig. S7.**

DNA methylation analysis in human cord blood, adult blood, MDS and AML patients. Shown are the percentages of methylated cytosines in the samples as obtained from DREAM analysis. Shown are all of the genes analyzed except the 3 genes in Figure 4B. Each dot corresponds to one individual. The bar in the graphs represents the median.

**Supplementary Fig. S8.**

Appearance ratio of SINE B1 elements in human MDS and *RUNX1* MDS model. X-axis (1 to 10) means distance from transcription start site (kb). Minus indicates upstream of transcripts. Red line indicates hypermethylated genes by MCAM. Blue and black lines indicate hypomethylated genes and genes which has CpG island.

**Supplementary Table S1.**

Mice samples analyzed.

**Supplementary Table S2.**

Summary of p-values obtained from t-tests comparing methylation percentages detected by pyrosequencing analysis.

**Supplementary Table S3.**

Summary of MCAM data in mouse models.

**Supplementary Table S4.**

Hyper- and hypomethylated genes in MDS models analyzed by MCAM.

**Supplementary Table S5.**

Significant terms in Ingenuity pathway analysis in mouse MDS models.

**Supplementary Table S6.**

Summary of r-values and p-values from spearman correlation between methylation percentages and age in mouse bone marrow and spleen.

**Supplementary Table S7.**

Summary of MCAM data in human MDS patients.

**Supplementary Table S8.**

Hyper- and hypomethylated genes in human MDS patients analyzed by MCAM.

**Supplementary Table S9.**

Significant terms in Ingenuity pathway analysis in human MDS patients for hypermethylated genes.

**Supplementary Table S10.**

Significant terms in Ingenuity pathway analysis in human MDS patients for hypomethylated genes.

**Supplementary Table S11.**

Overlapped genes between mouse models and human MDS patients.

**Supplementary Table S12.**

Raw data detected by DREAM in human samples.

**Supplementary Table S13.**

Normalized methylation values detected by DREAM in human samples.

**Supplementary Table S14.**

Summary of p-values obtained from t-tests comparing methylation percentages detected by DREAM analysis.

**Supplementary Table S15.**

Methylation change by polycomb status in MDS models and human MDS patients.

**Supplementary Table S16.**

Mouse primer sequences and PCR conditions for bisulfite pyrosequencing analysis.
