# Supplementary figures and images for: Age-related epigenetic drift in the pathogenesis of MDS and AML
Source: HighWire-hosted journal article supplement (doi:10.1101/gr.157529.113), 2014-01-10

A

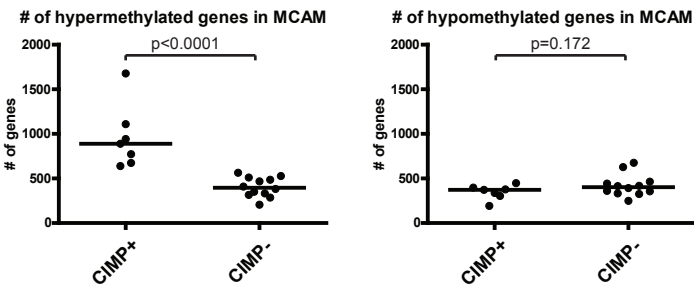

B

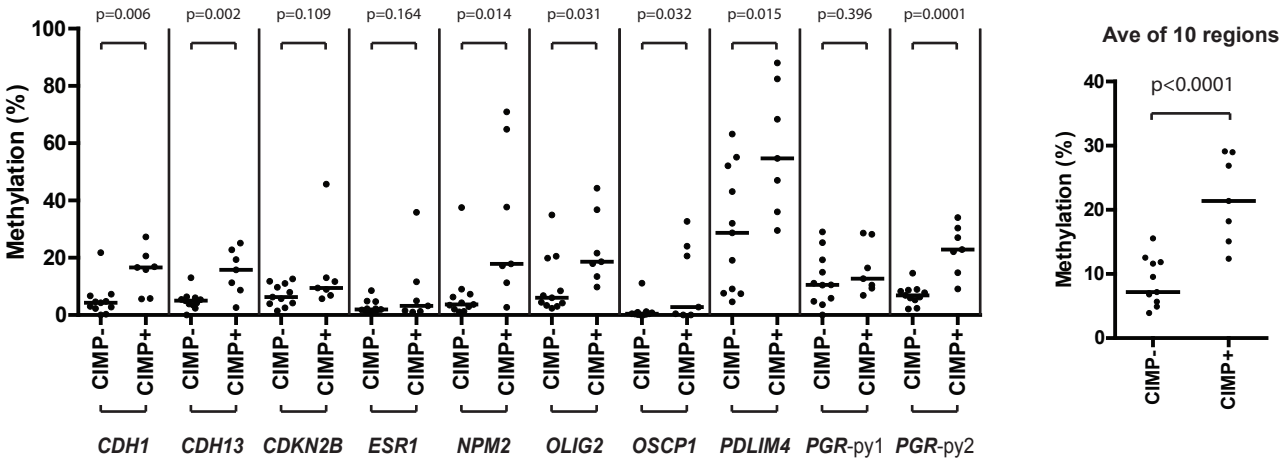

Supplementary Figure S6

Supplement: Supp_FigS6.pdf [file Supp_FigS6.pdf]
